# Supplementary material for: CWL-Airflow: a lightweight pipeline manager supporting Common Workflow Language
Source: PubMed Central journal article supplement (PMC6639121; doi:10.1093/gigascience/giz084), 2019-07-18
Supplement: giz084_response_to_reviewer_comments_revision_1.pdf [file giz084_response_to_reviewer_comments_revision_1.pdf]

## Author's Response To Reviewer Comments

Close

As suggested by reviewer 2, we have corrected the typos in the text. We would also like to include a Research Object bundle for our CWL workflow as a supplemental file; however the EM system unzips the RO bundle. I'll be happy to submit it by email.

Close
